# Supplementary material
Source: PubMed Central journal article supplement (PMC7609946)
Supplement: supplementaltable_final_bhaa199.pdf [file supplementaltable_final_bhaa199.pdf]

Table S1.

Complete listing of all parameter estimates from the final model.

| <b>Measure/relationship estimated</b>        | <b>B</b> | <b>SE</b> | <b><math>\beta</math></b> | <b><i>p</i></b>   |
|----------------------------------------------|----------|-----------|---------------------------|-------------------|
| <i>Reaction Time predicted by</i>            |          |           |                           |                   |
| L Parietal (planning)                        | -3.96    | 3.81      | -.17                      | .30               |
| L Precentral (planning)                      | -1.73    | 1.48      | -.12                      | .24               |
| R Parietal (planning)                        | 3.66     | 2.70      | .18                       | .18               |
| R Precentral (planning)                      | .66      | 2.40      | .032                      | .79               |
| Age                                          | -74.51   | 13.88     | -.49                      | < .001            |
| <i>L Parietal (execution) predicted by</i>   |          |           |                           |                   |
| L Parietal (planning)                        | .98      | .15       | .82                       | < .001            |
| L Precentral (planning)                      | .078     | .041      | .11                       | .054              |
| R Parietal (planning)                        | -.055    | .11       | -.053                     | .63               |
| R Precentral (planning)                      | .012     | .052      | .012                      | .81               |
| Age                                          | -.12     | .43       | -.016                     | .78               |
| <i>L Precentral (execution) predicted by</i> |          |           |                           |                   |
| L Parietal (planning)                        | .21      | .095      | .12                       | .026 <sup>a</sup> |
| L Precentral (planning)                      | 1.02     | .029      | .93                       | < .001            |
| R Parietal (planning)                        | -.13     | .074      | -.084                     | .075              |
| R Precentral (planning)                      | -.013    | .060      | -.008                     | .83               |
| Age                                          | -.18     | .32       | -.016                     | .58               |
| <i>R Parietal (execution) predicted by</i>   |          |           |                           |                   |
| L Parietal (planning)                        | .12      | .11       | .11                       | .25               |
| L Precentral (planning)                      | .027     | .041      | .038                      | .52               |
| R Parietal (planning)                        | .78      | .080      | .78                       | < .001            |
| R Precentral (planning)                      | .027     | .062      | .028                      | .66               |
| Age                                          | -.27     | .32       | -.037                     | .39               |
| <i>R Precentral (execution) predicted by</i> |          |           |                           |                   |
| L Parietal (planning)                        | .085     | .15       | .057                      | .57               |
| L Precentral (planning)                      | .15      | .057      | .17                       | .007              |
| R Parietal (planning)                        | -.11     | .11       | -.088                     | .31               |
| R Precentral (planning)                      | 1.04     | .076      | .81                       | < .001            |
| Age                                          | -.49     | .43       | -.051                     | .26               |
| <i>Movement Duration predicted by</i>        |          |           |                           |                   |
| L Parietal (planning)                        | 6.63     | 5.07      | .30                       | .19               |
| L Precentral (planning)                      | 3.11     | 4.12      | .24                       | .45               |
| R Parietal (planning)                        | -12.73   | 4.85      | -.67                      | .009              |
| R Precentral (planning)                      | .63      | 3.66      | .033                      | .86               |
| L Parietal (execution)                       | -5.40    | 4.36      | -.30                      | .22               |
| L Precentral (execution)                     | -2.85    | 4.07      | -.24                      | .49               |

|                                                 |        |        |       |                   |
|-------------------------------------------------|--------|--------|-------|-------------------|
| R Parietal (execution)                          | 13.24  | 5.39   | .70   | .014              |
| R Precentral (execution)                        | -1.11  | 2.84   | -.076 | .70               |
| Reaction Time                                   | .47    | .094   | .52   | < .001            |
| Age                                             | -18.61 | 14.03  | -.13  | .19               |
| <i>L Parietal (planning) predicted by</i>       |        |        |       |                   |
| Age                                             | -1.69  | .67    | -.27  | .012              |
| <i>L Precentral (planning) predicted by</i>     |        |        |       |                   |
| Age                                             | -1.98  | 1.10   | -.19  | .071              |
| <i>R Parietal (planning) predicted by</i>       |        |        |       |                   |
| Age                                             | -1.70  | .83    | -.23  | .040 <sup>a</sup> |
| <i>R Precentral (planning) predicted by</i>     |        |        |       |                   |
| Age                                             | -.81   | .64    | -.11  | .21               |
| <i>L Parietal (planning) correlated with</i>    |        |        |       |                   |
| L Precentral (planning)                         | 96.81  | 28.41  | .61   | .001              |
| R Parietal (planning)                           | 8.86   | 24.88  | .74   | .001              |
| R Precentral (planning)                         | 49.02  | 11.13  | .44   | < .001            |
| <i>L Precentral (planning) correlated with</i>  |        |        |       |                   |
| R Parietal (planning)                           | 79.06  | 27.33  | .43   | .004              |
| R Precentral (planning)                         | 74.17  | 25.40  | .39   | .004              |
| <i>R Parietal (planning) correlated with</i>    |        |        |       |                   |
| R Precentral (planning)                         | 5.91   | 9.94   | .39   | < .001            |
| <i>L Parietal (execution) correlated with</i>   |        |        |       |                   |
| L Precentral (execution)                        | 11.89  | 4.14   | .42   | .004              |
| R Parietal (execution)                          | 19.52  | 5.67   | .64   | .001              |
| R Precentral (execution)                        | 21.38  | 8.82   | .50   | .015              |
| Reaction Time                                   | 197.09 | 17.11  | .15   | .25               |
| <i>L Precentral (execution) correlated with</i> |        |        |       |                   |
| R Parietal (execution)                          | 9.38   | 2.92   | .42   | .001              |
| R Precentral (execution)                        | 6.47   | 4.21   | .21   | .12               |
| Reaction Time                                   | 138.04 | 109.49 | .15   | .21               |
| <i>R Parietal (execution) correlated with</i>   |        |        |       |                   |
| R Precentral (execution)                        | 17.57  | 4.98   | .51   | < .001            |
| Reaction Time                                   | 166.89 | 107.70 | .16   | .12               |
| <i>R Precentral (execution) correlated with</i> |        |        |       |                   |
| Reaction Time                                   | 242.66 | 144.51 | .17   | .093              |

<sup>a</sup>These parameters were not statistically significant following FDR correction

“B” = unstandardized coefficient; “SE” = standard error about the unstandardized coefficient;

“β” = standardized coefficient
